# Supplementary material
Source: PubMed Central journal article supplement (PMC2932444)

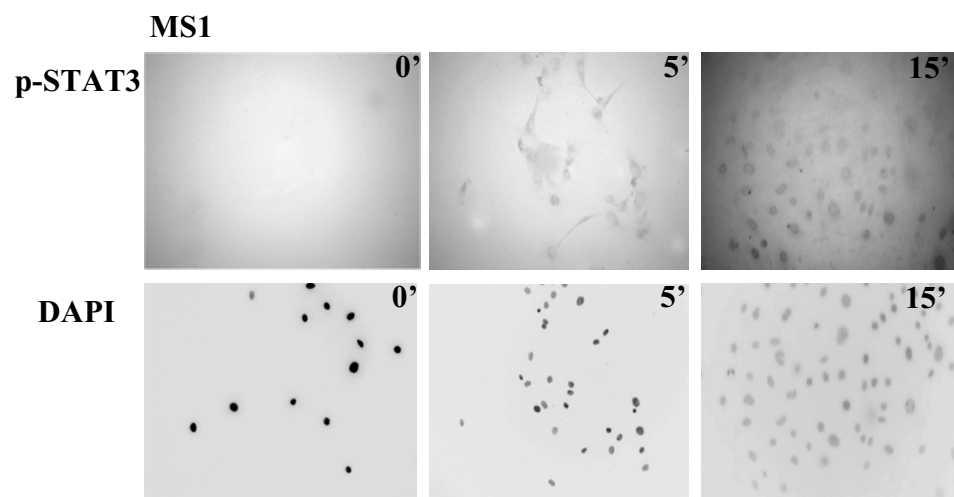

**Supplementary Figure 1**

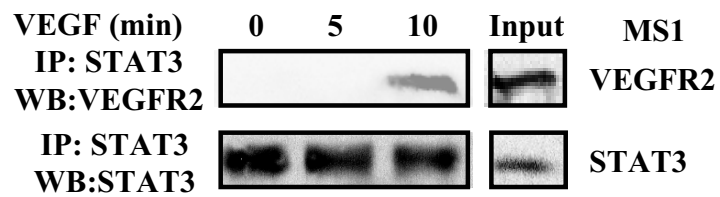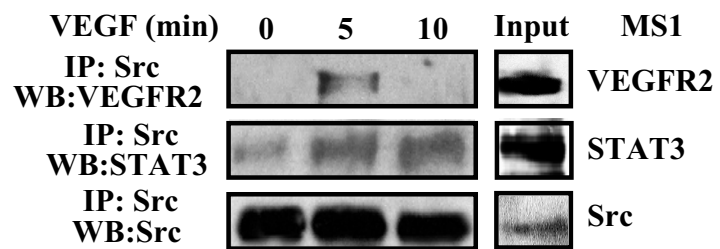

Supplementary Figure 2

Supplement: NIHMS230660-supplement-2.pdf [file NIHMS230660-supplement-2.pdf]
